# Supplementary material for: The ‘Erlenmeter’: a low-cost, open-source turbidimeter for no-sampling phenotyping of microorganism growth
Source: PeerJ journal article supplement (doi:10.7717/peerj.17659), 2024-07-09

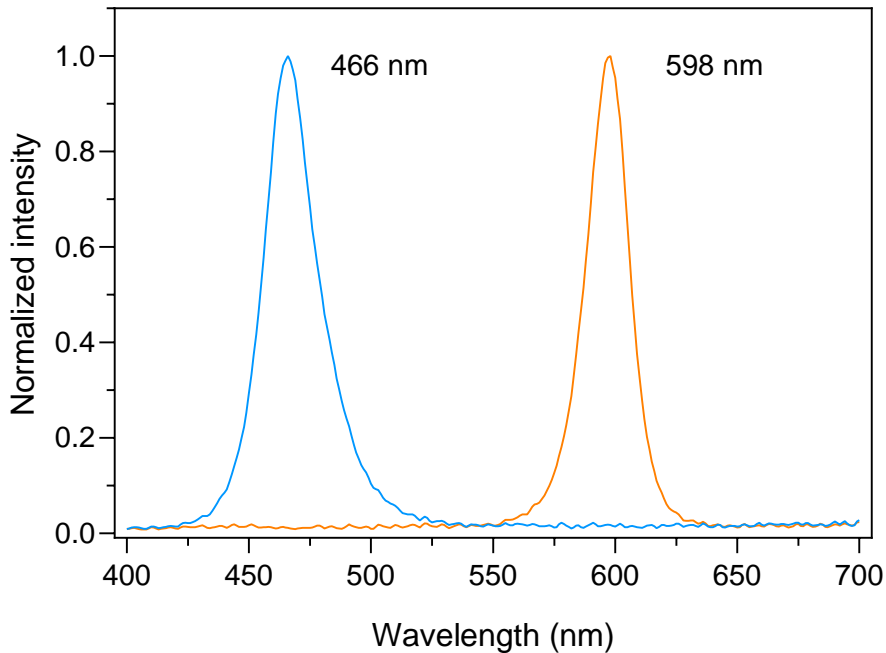

Supplement: FigS1_97549JTstaff.pdf [file FigS1_97549JTstaff.pdf]
